# Supplementary material
Source: HighWire-hosted journal article supplement (http://www.qdcxjkg.com/highwire/filestream/113180/field_highwire_adjunct_files/0/Supplementary_material.pdf)
Supplement: Supplementary_material.pdf [file Supplementary_material.pdf]

Supplemental data

Fig. 1

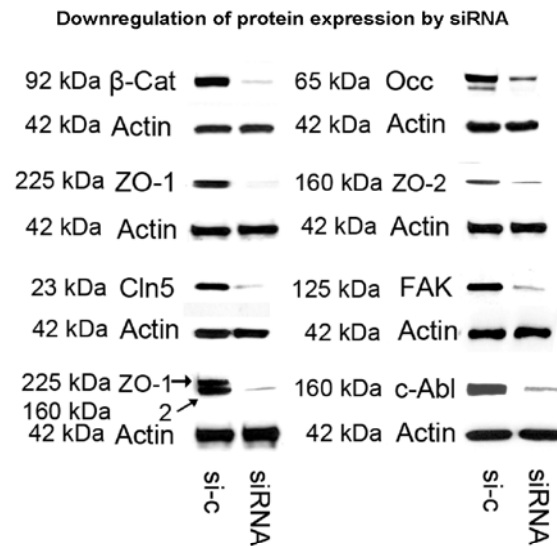

**Supplemental Figure 1. Downregulation of protein expression by various siRNAs.** EC (70% confluent) were transfected with 100 nM siRNA using DharmaFECT 1 transfection reagent per manufacturer's protocol. Silencing efficacy was checked 72 h after siRNA transfection by Western blot. Results are representative of several independent experiments.

Supplemental data

Fig. 2

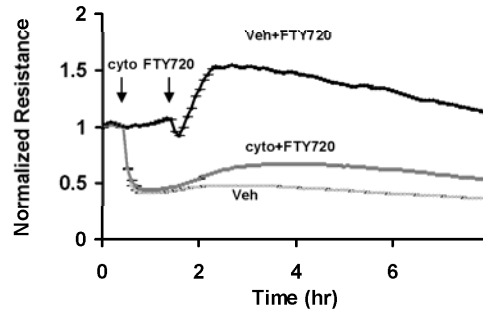

**Supplemental Figure 2. Disruption of actin filaments attenuates EC barrier enhancement by FTY720.** HPAEC were preincubated for 1 h with the actin depolymerizing agent, cytochalasin D (cyto, 0.1  $\mu\text{g/ml}$  final) or vehicle control (first arrow) and then stimulated with FTY720 (1  $\mu\text{M}$ ) or vehicle (second arrow). A representative TER tracing is shown.
